# Supplementary material
Source: PubMed Central journal article supplement (PMC1803750)

## Supplemental Data

**Figure S1.** Phenotypes of three-days-old etiolated seedlings of two independent representative transgenic lines for each construct used. Seedlings were grown under ambient/endogenous (Control) and ethylene-free (100  $\mu$ M Ag+) conditions. The transgenic lines include *etr1-7* plants transformed with the wild type genomic *ETR1* gene (*gETR1*), the cDNA *ETR1* gene containing a H353Q mutation (*cH353Q*), and the wild type cDNA *ETR1* gene (*cETR1*). For comparison, wild type (ethylene-sensitive), *etr1-7* (ethylene-sensitive *etr1* null), *etr1-1* (strong ethylene-insensitive) and *etr1-2* (weak ethylene-insensitive) seedlings are shown together.

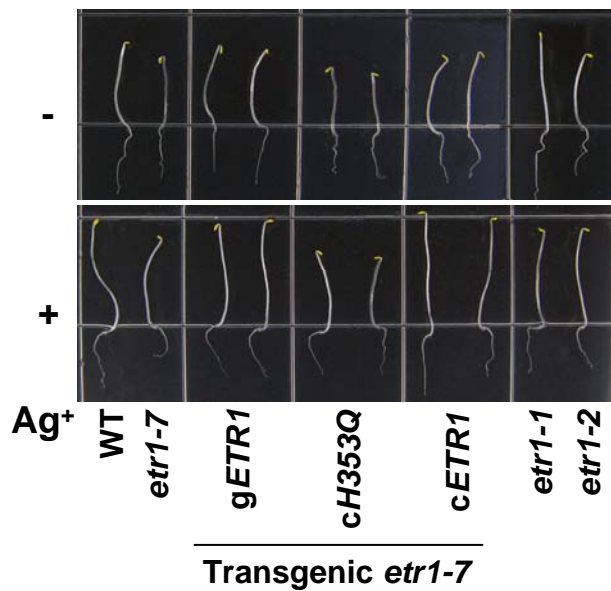

Supplement: plntphys_pp.106.091504_1.pdf [file plntphys_pp.106.091504_1.pdf]
