# Supplementary material
Source: PubMed Central journal article supplement (PMC1803750)

## Supplemental Data

**Figure S2.** Relative expressions of *ARR 1* (At3g16857) in the 4-days-old etiolated seedlings.

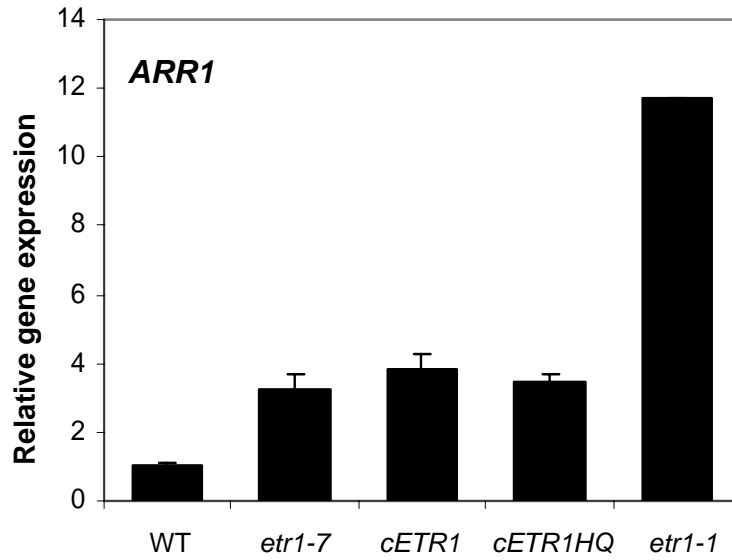

Supplement: plntphys_pp.106.091504_2.pdf [file plntphys_pp.106.091504_2.pdf]
